# Supplementary material for: Computed Tomography Angiography-Derived Scores for Prediction of Chronic Total Occlusion Percutaneous Coronary Intervention Using the Hybrid Algorithm
Source: MDPI journal article supplement (doi:10.3390/jcdd11010003), 2023-12-22

**Figure S1.** Time to successful CTO guidewire crossing depending on number of points in (a) J-CTO<sub>CA</sub>, (b) CT-RECTOR, (c) KCCT, (d) J-CTO<sub>CCTA</sub>, and (e) RECHARGE<sub>CCTA</sub> scoring systems.

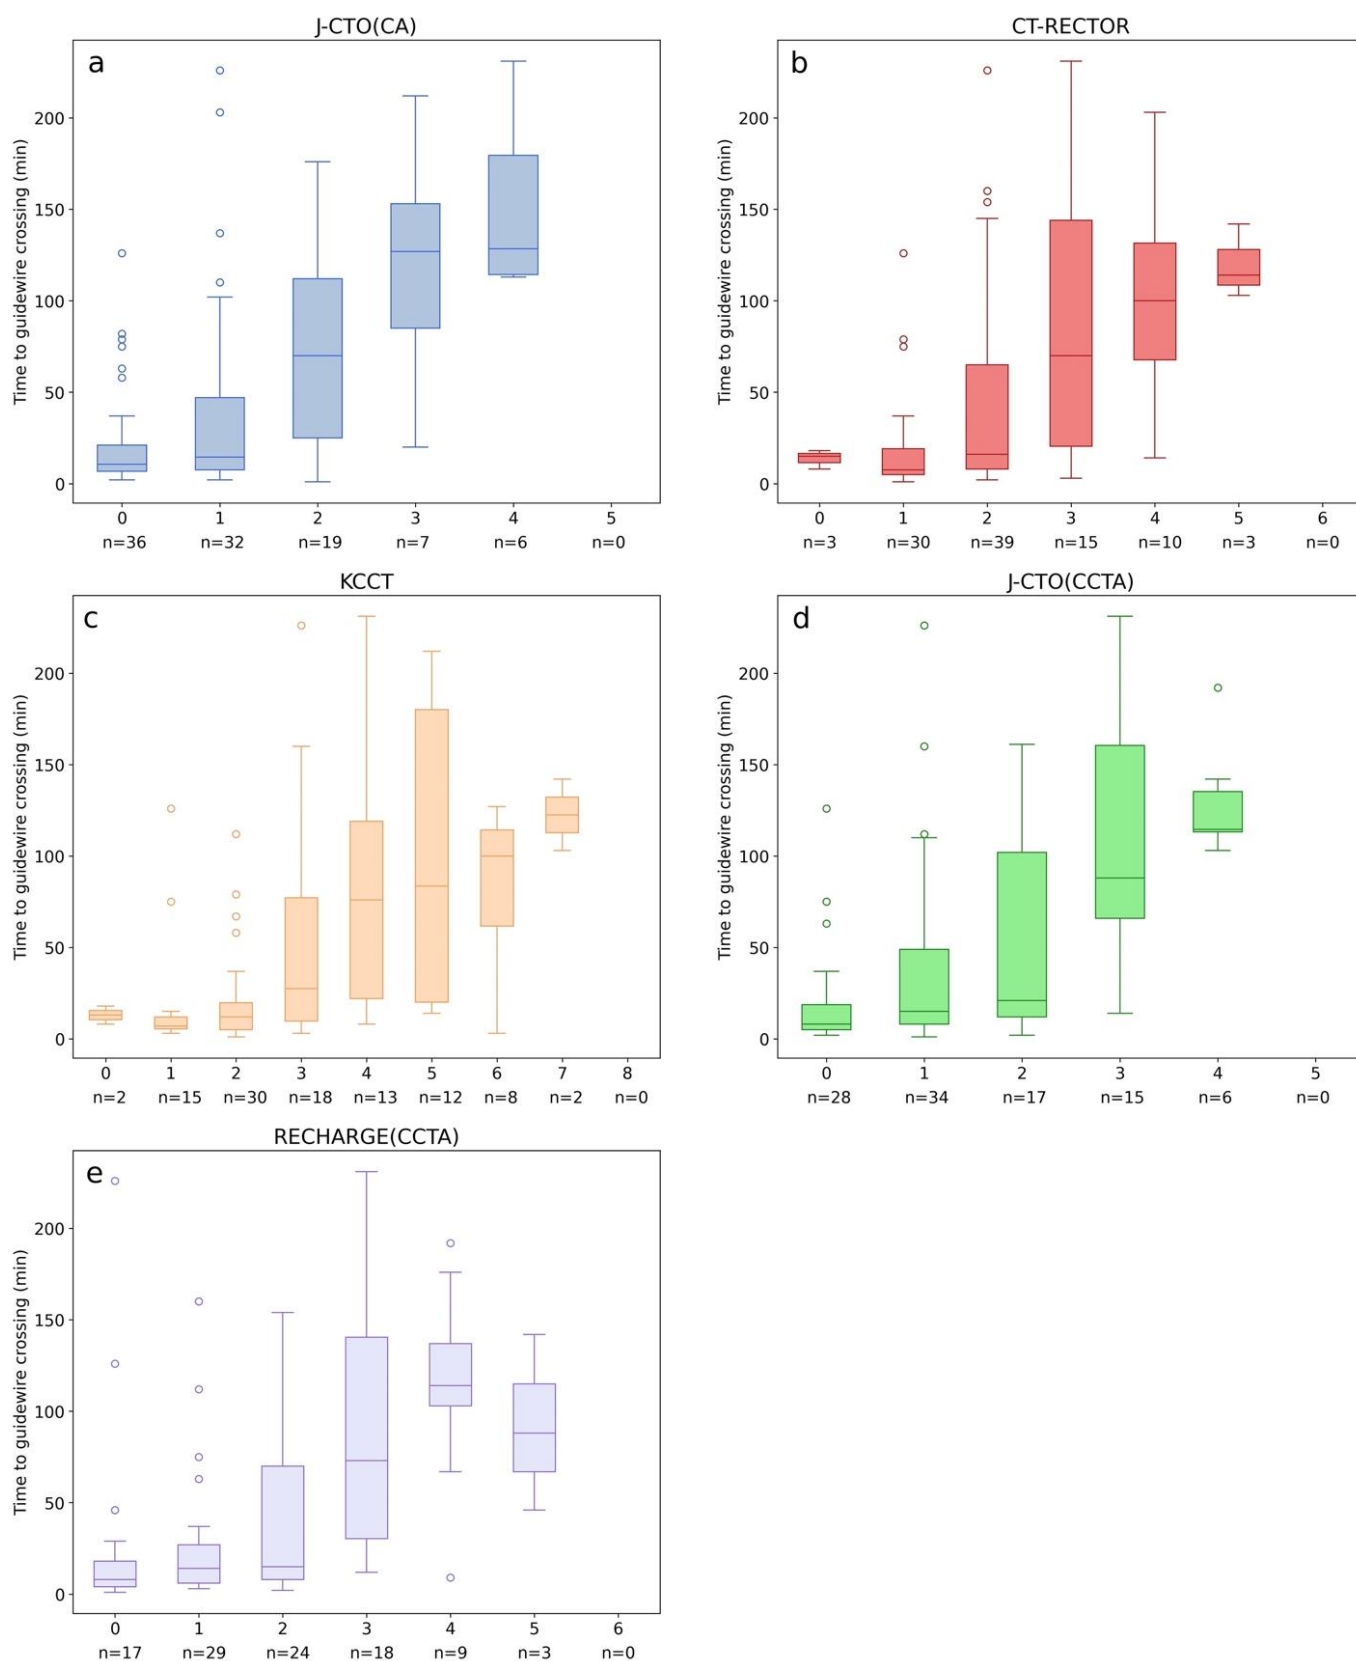

**Figure S2.** Time-efficient guidewire crossing and final procedural success rates depending on number of points in (a) J-CTO<sub>CA</sub>, (b) CT-RECTOR, (c) KCCT, (d) J-CTO<sub>CCTA</sub>, and (e) RECHARGE<sub>CCTA</sub> scoring systems.

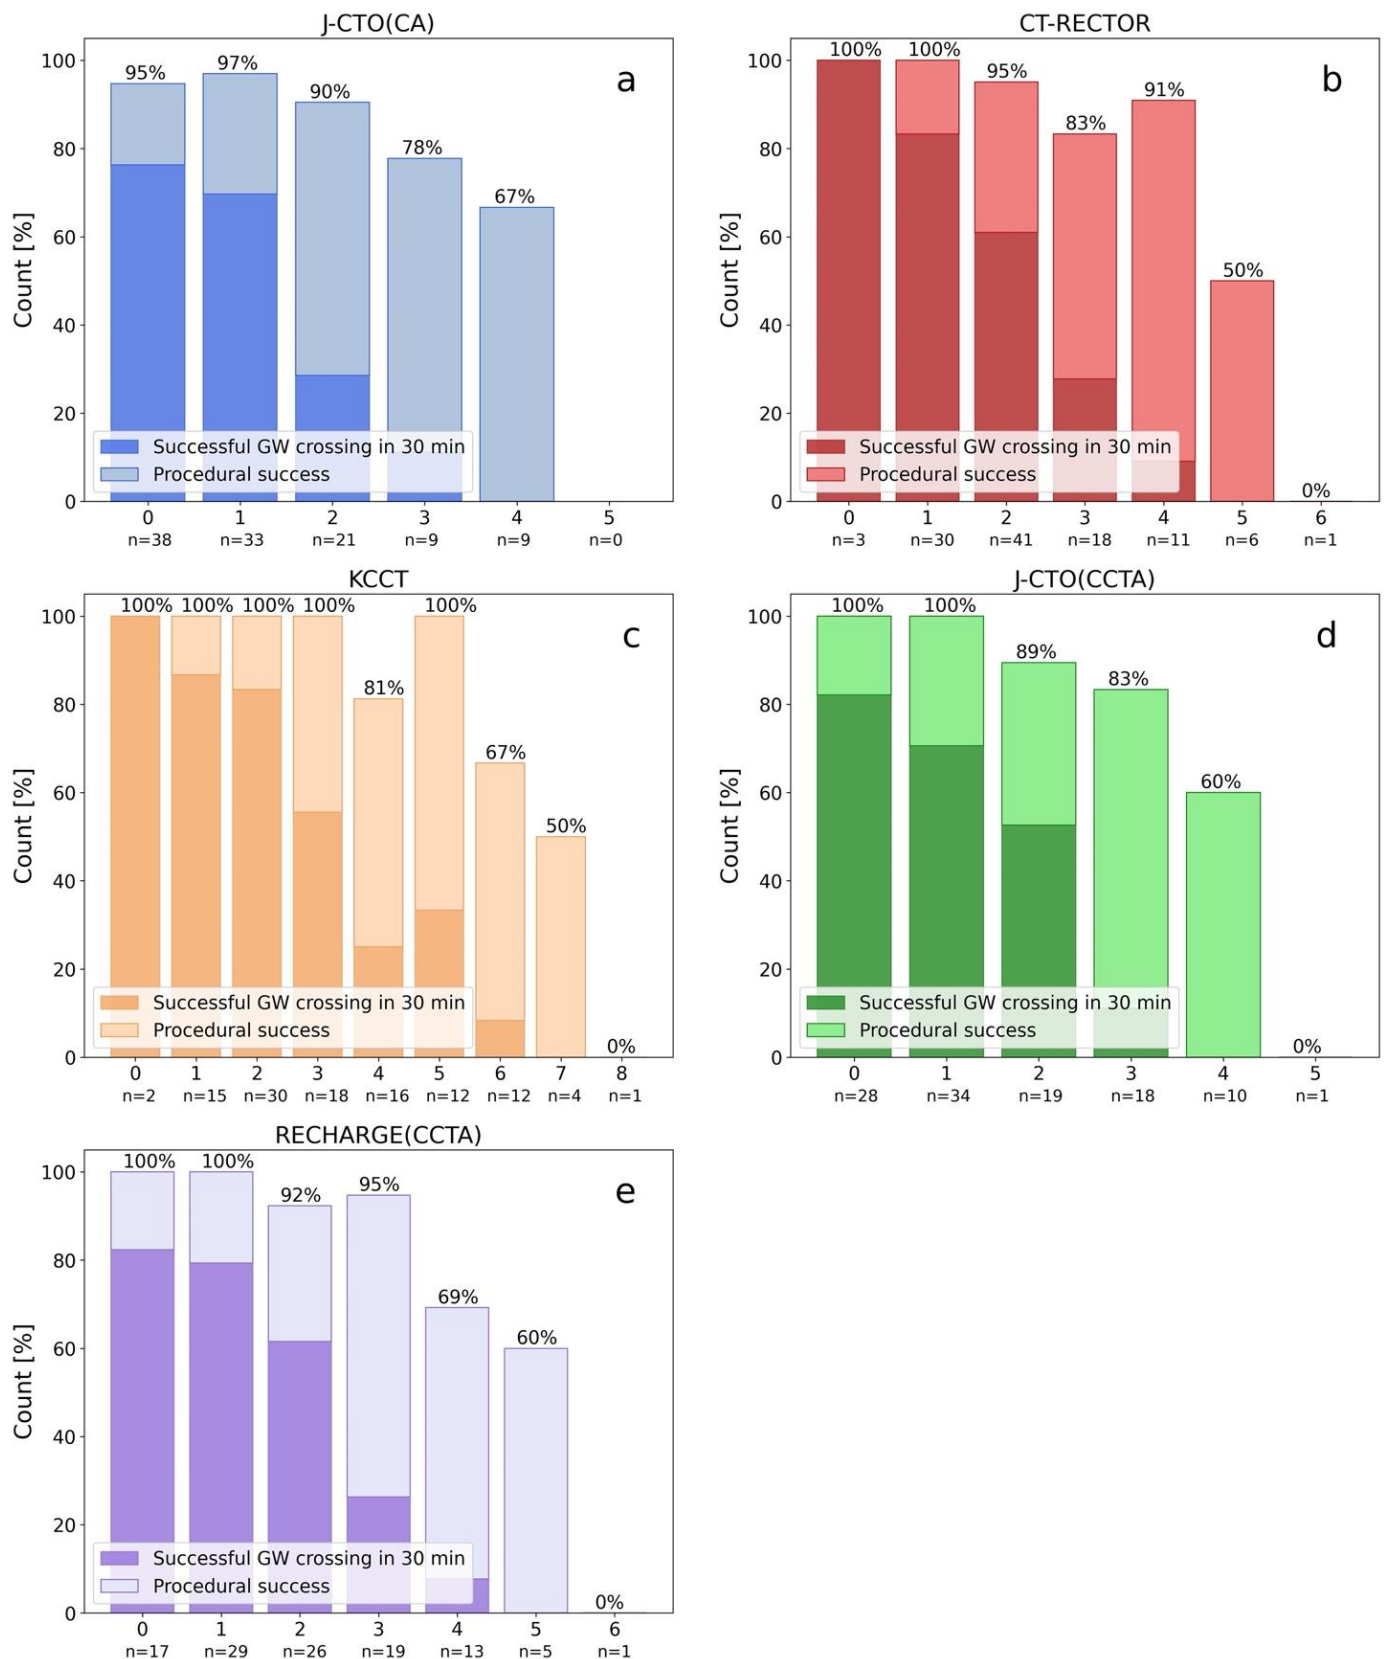

**Figure S3.** Time-efficient guidewire crossing and final procedural success rates depending on difficulty category based on (a) J-CTO<sub>CA</sub>, (b) CT-RECTOR, (c) KCCT, (d) J-CTO<sub>CCTA</sub>, and (e) RECHARGE<sub>CCTA</sub> scoring systems.

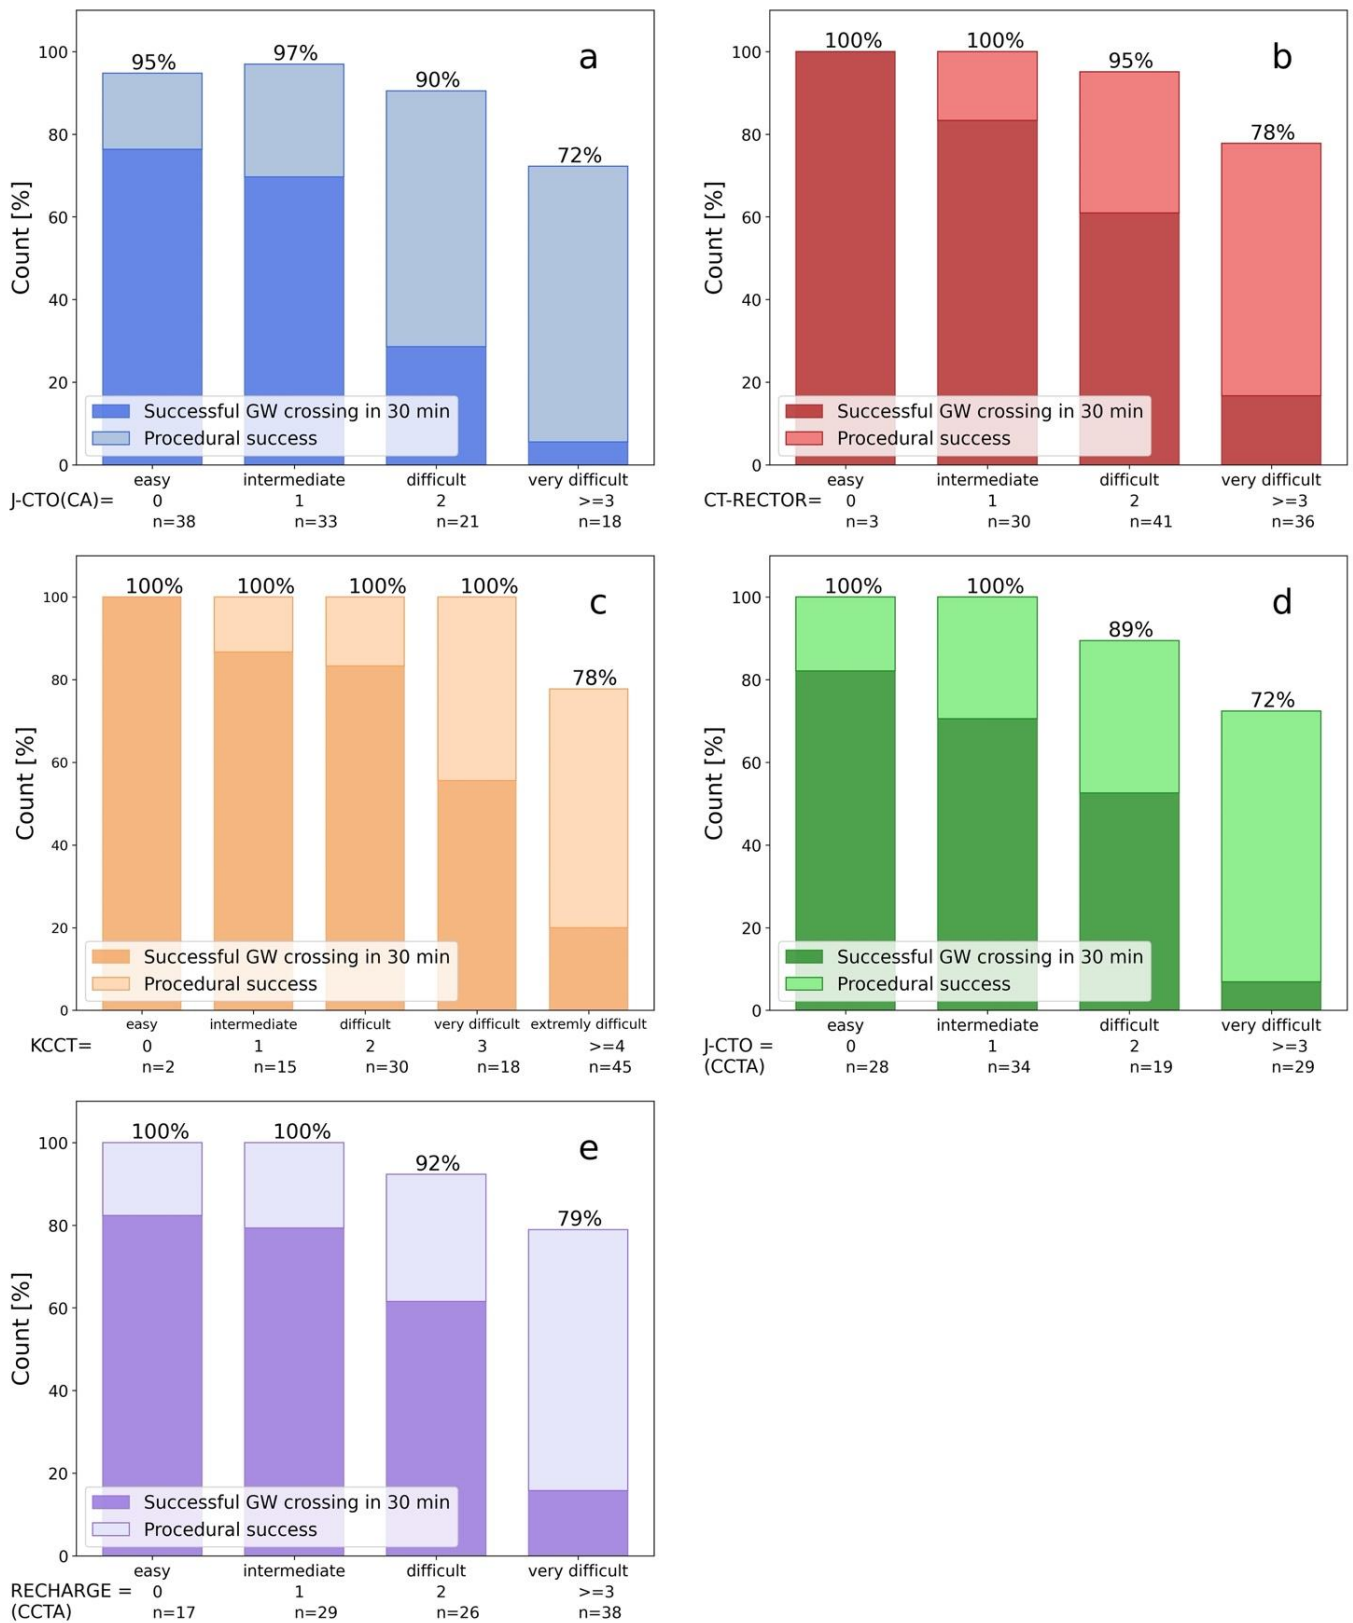

Supplement: s1 [file s1]
